# Supplementary figures and images for: Rate control drugs differ in the prevention of progression of atrial fibrillation
Source: PubMed Central journal article supplement — Europace. 2021 Aug 20;24(3):384–9. doi: 10.1093/europace/euab191 (PMC8892061; doi:10.1093/europace/euab191), 2021-08-20

## Supplementary material

Figure S1

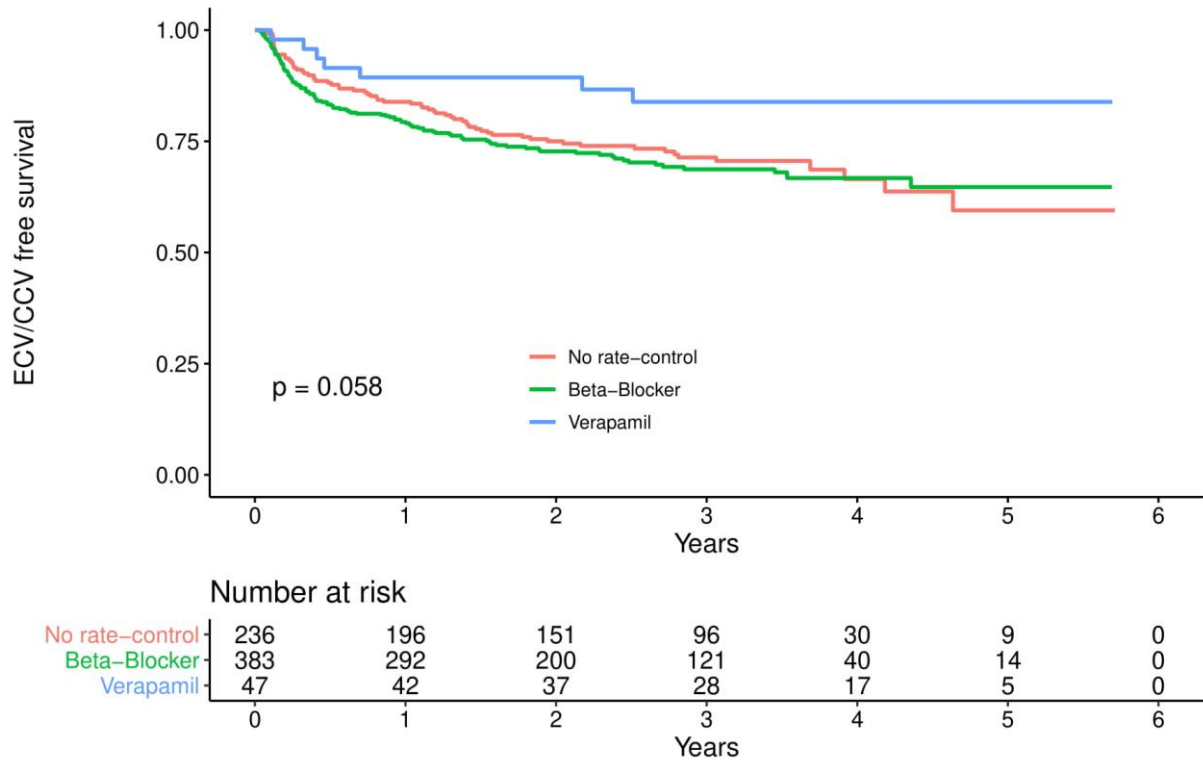

Supplement: euab191_supplementary_data.pdf [file euab191_supplementary_data.pdf]
